# Supplementary material
Source: PubMed Central journal article supplement (PMC3269159)
Supplement: supp_M018606_jlr.M018606-1.pdf [file supp_M018606_jlr.M018606-1.pdf]

**TABLE S1a.**Statistical Analysis for the PFAM Production Data from the N<sub>18</sub>TG<sub>2</sub> Cells<sup>a,b</sup>

| PFAM Precursor                    | f-value | df   | p-value | 0 | 12 | 24 | 48 |
|-----------------------------------|---------|------|---------|---|----|----|----|
| Tridecanoic acid                  | 16.0772 | 3,15 | 0.0002  | A | A  | A  | B  |
| <i>N</i> -Tridecanoylethanolamine | 10.0030 | 3,15 | 0.0014  | A | A  | AB | B  |
| Palmitoleic acid                  | 87.0423 | 3,12 | <0.0001 | A | A  | B  | C  |
| Palmitic acid                     | 15.1093 | 3,13 | 0.0005  | A | A  | A  | B  |
| Oleic acid                        | 4.8179  | 3,13 | 0.0251  | A | AB | B  | AB |
| Elaidic acid                      | 29.1613 | 3,15 | <0.0001 | A | A  | A  | B  |
| Linoleic acid                     | 26.7950 | 3,15 | <0.0001 | A | A  | A  | B  |

**TABLE S1b.**Statistical Analysis for the PFAM Production Data from the N<sub>18</sub>TG<sub>2</sub> Cell Conditioned Media<sup>a,b</sup>

| PFAM Precursor                    | f-value  | df   | p-value | 0 | 12 | 24 | 48 |
|-----------------------------------|----------|------|---------|---|----|----|----|
| Tridecanoic acid                  | 23.0869  | 3,15 | <0.0001 | A | AB | AB | C  |
| <i>N</i> -Tridecanoylethanolamine | 10.3890  | 3,15 | 0.0012  | A | A  | AB | B  |
| Palmitoleic acid                  | 27.9906  | 3,11 | 0.0001  | A | A  | B  | C  |
| Palmitic acid                     | 25.1372  | 3,14 | <0.0001 | A | A  | A  | B  |
| Oleic acid                        | 30.7763  | 3,13 | <0.0001 | A | B  | C  | C  |
| Elaidic acid                      | 387.4201 | 3,15 | <0.0001 | A | B  | B  | C  |
| Linoleic acid                     | 25.8075  | 3,15 | <0.0001 | A | B  | B  | C  |

<sup>a</sup>One-way ANOVA test was used to test for significant differences over the time course of the incubation with the indicated PFAM precursor. Post-hoc Tukey test was used to compare the differences between the means. The PFAM production data is contained in Table 4.

<sup>b</sup>PFAM amounts measured at a specific time interval from one specific PFAM precursor that do not share the same letter are significantly different with a p-value <0.05 (post ANOVA Tukey test). For example, the amount of PFAM produced at 0 hr and 12 hr are both labeled with "A", there is no significant difference between the amounts measured. If the amount of PFAM produced at 0 hr is labeled with "A" and that at 12 hr is labeled with "B", there is a significant difference between the amounts PFAM produced.

**TABLE S2a.**Statistical Analysis for the PFAM Production Data from the SCP Cells<sup>a,b</sup>

| PFAM Precursor                    | f-value  | df   | p-value | 0  | 12 | 24 | 48 |
|-----------------------------------|----------|------|---------|----|----|----|----|
| Tridecanoic acid                  | 16.5546  | 3,15 | <0.0001 | A  | B  | B  | B  |
| <i>N</i> -Tridecanoylethanolamine | 41.6328  | 3,14 | <0.0001 | A  | AB | B  | C  |
| Palmitoleic acid                  | 5.2326   | 3,14 | 0.0173  | A  | AB | B  | B  |
| Palmitic acid                     | 259.8576 | 3,14 | <0.0001 | A  | A  | A  | B  |
| Oleic acid                        | 2.5508   | 3,15 | 0.1046  | A  | A  | A  | A  |
| Elaidic acid                      | 8.4551   | 3,13 | 0.0043  | AB | B  | B  | B  |
| Linoleic acid                     | 25.7505  | 3,15 | <0.0001 | A  | A  | A  | B  |

**TABLE S2b.**Statistical Analysis for the PFAM Production Data from the SCP Cell Conditioned Media<sup>a,b</sup>

| PFAM Precursor                    | f-value | df   | p-value | 0 | 12 | 24 | 48 |
|-----------------------------------|---------|------|---------|---|----|----|----|
| Tridecanoic acid                  | 20.4247 | 3,14 | <0.0001 | A | B  | BC | C  |
| <i>N</i> -Tridecanoylethanolamine | 62.9980 | 3,15 | <0.0001 | A | A  | B  | C  |
| Palmitoleic acid                  | 44.6218 | 3,14 | <0.0001 | A | B  | B  | C  |
| Palmitic acid                     | 24.4359 | 3,15 | <0.0001 | A | A  | A  | B  |
| Oleic acid                        | 15.8757 | 3,15 | 0.0002  | A | A  | B  | B  |
| Elaidic acid                      | 44.4201 | 3,11 | <0.0001 | A | A  | B  | C  |
| Linoleic acid                     | 8.2368  | 3,14 | 0.0037  | A | B  | AB | B  |

<sup>a</sup>One-way ANOVA test was used to test for significant differences over the time course of the incubation with the indicated PFAM precursor. Post-hoc Tukey test was used to compare the differences between the means. The PFAM production data is contained in Table 4.

<sup>b</sup>PFAM amounts measured at a specific time interval from one specific PFAM precursor that do not share the same letter are significantly different with a p-value <0.05 (post ANOVA Tukey test). For example, the amount of PFAM produced at 0 hr and 12 hr are both labeled with "A", there is no significant difference between the amounts measured. If the amount of PFAM produced at 0 hr is labeled with "A" and that at 12 hr is labeled with "B", there is a significant difference between the amounts PFAM produced.

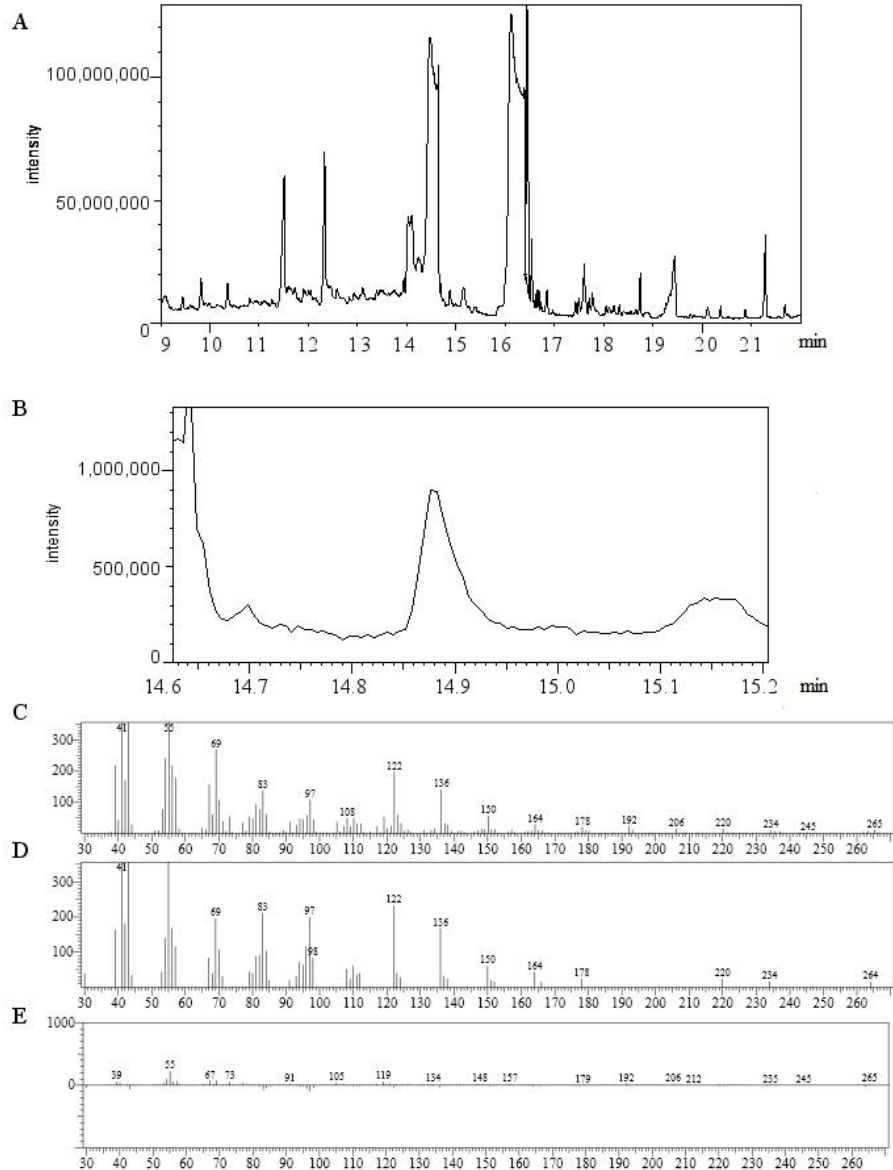

**Figure S1. GC-MS of the N<sub>18</sub>TG<sub>2</sub> Cell Extract after Incubation with Oleic Acid (48 hr).** Oleamide was extracted from the cells, derivitized with BSTFA, and quantified by GC-MS as described in the Methods. Panel A: The gas chromatogram from 9-22 min of the N<sub>18</sub>TG<sub>2</sub> cell extract. Panel B: The gas chromatograph from 14.6-15.2 min of the N<sub>18</sub>TG<sub>2</sub> cell extract highlighting the peak for oleonitrile. Panel C: The total ion chromatogram mass spectrum of the oleonitrile peak. Panel D: Standard mass spectrum for oleonitrile from the library database. Panel E: The difference between the panels C and D.

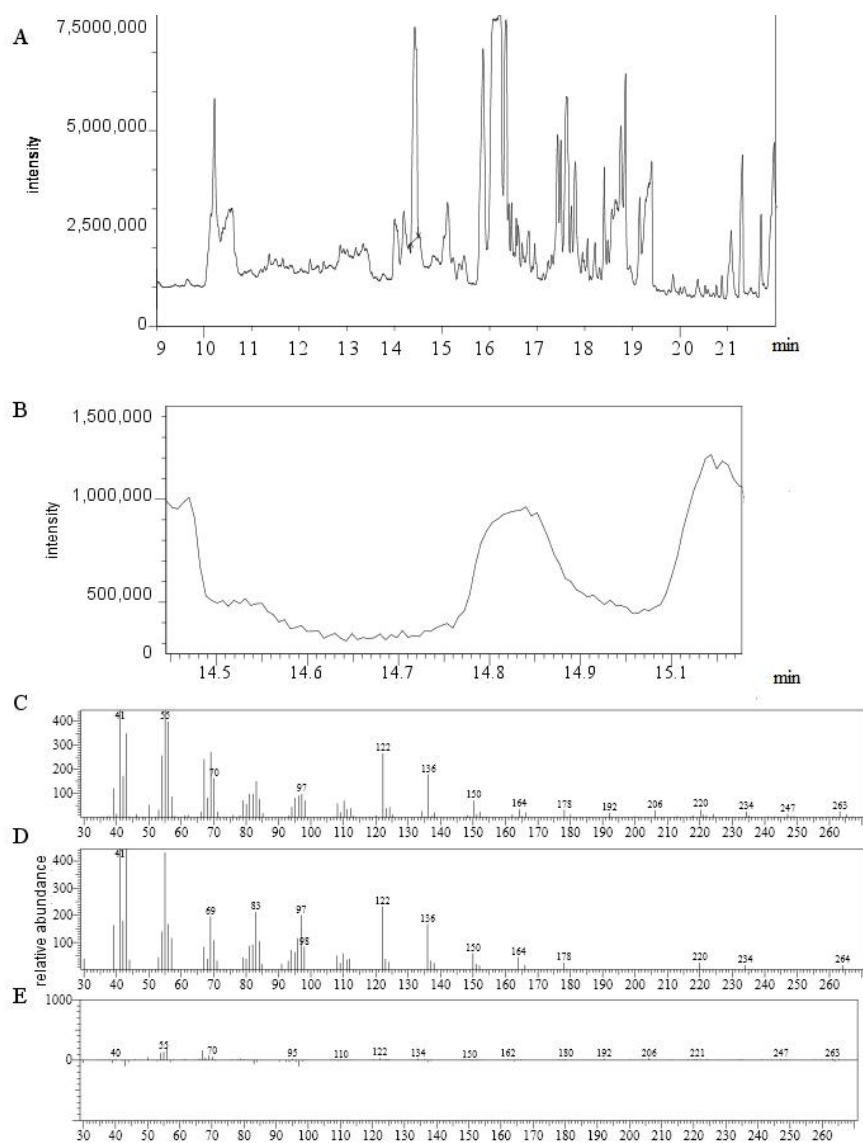

**Figure S2. GC-MS of the SCP Cells Extract after Incubation with Oleic Acid (48 hr).** Oleamide was extracted from the cells, derivitized with BSTFA, and quantified by GC-MS as described in the Methods. Panel A: The gas chromatogram from 9-22 min of the SCP cell extract. Panel B: The gas chromatograph from 14.4-15.2 min of the SCP extract highlighting the peak for oleonitrile. Panel C: The total ion chromatogram mass spectrum of the oleonitrile peak. Panel D: Standard mass spectrum for oleonitrile from the library database. Panel E: The difference between the panels C and D.
